# Supplementary material for: Case Report: Humanized Selective CD19CAR-T Treatment Induces MRD-Negative Remission in a Pediatric B-ALL Patient With Primary Resistance to Murine-Based CD19CAR-T Therapy
Source: PubMed Central journal article supplement (PMC7786099; doi:10.3389/fimmu.2020.581116), 2020-12-23
Supplement: DataSheet_1.pdf [file DataSheet_1.pdf]

### Supplementary figure legend

Supplementary figure 1. Circulating B cell percentages in patient. Peripheral B cells were analyzed at different time points before and after CD19mCAR-T (blue square solid line) and CD19hsCAR-T (red dot dashed line) infusion. The arrow indicates the second infusion of CD19mCAR-T.

Supplementary figure 2. Changes of bilirubin levels following treatment with CD19hsCAR-T. Total bilirubin (TBil, red dot solid line) and direct bilirubin (DBil, blue square dashed line) levels in patient's sera were measured at a series of indicated time points.

Figure S1

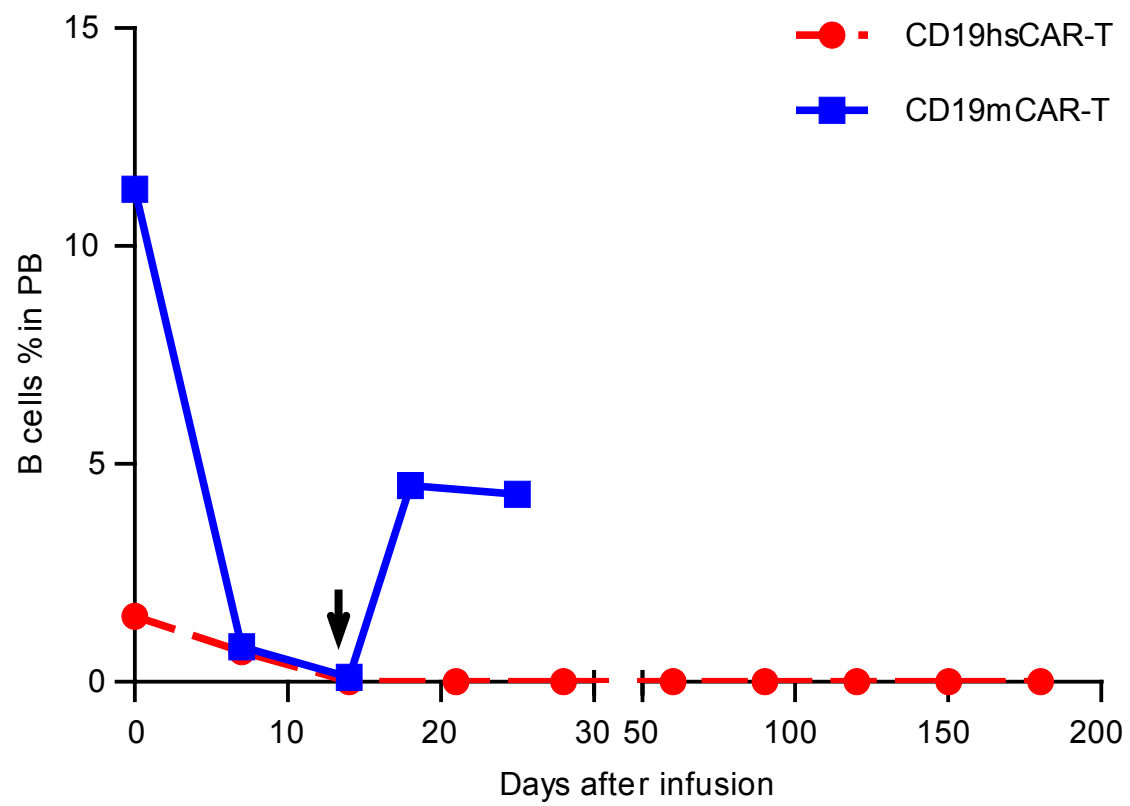

Figure S2

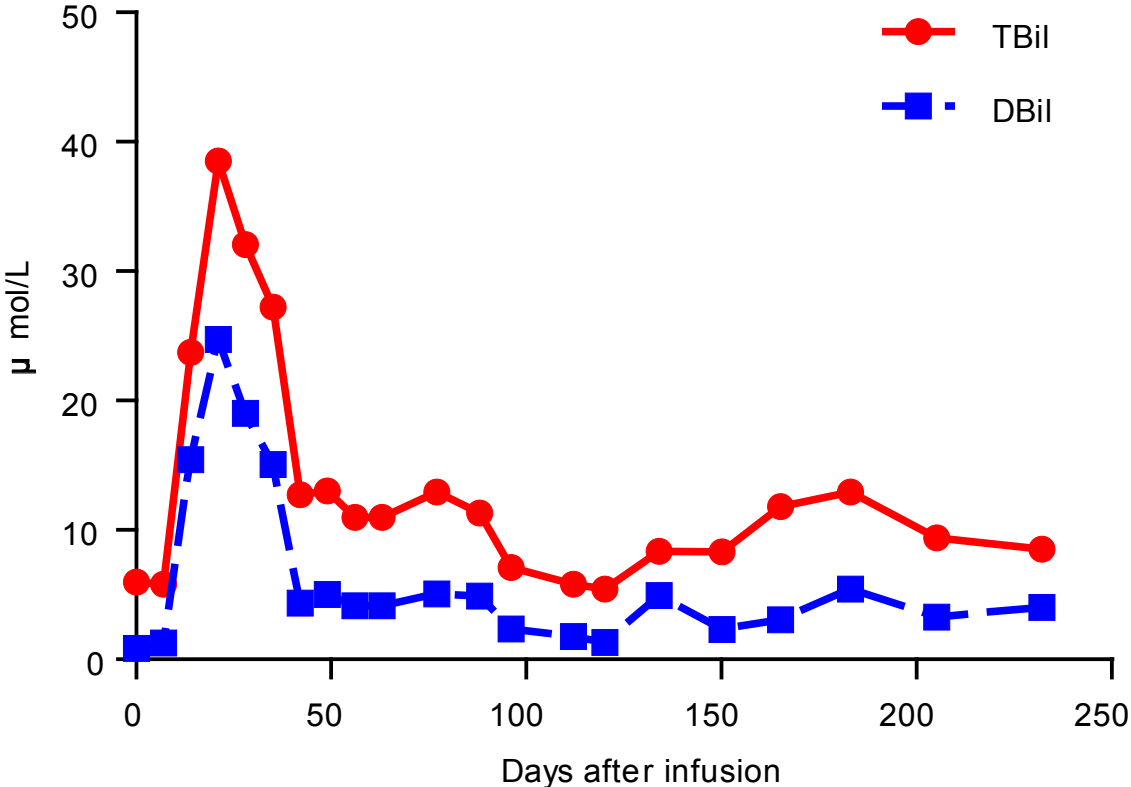

Table S1. Clinical test results of bone marrow samples.

| Date       | Major results of bone marrow samples                                                                                                                                                                                                                                                                                                                                      | Note                                                          |
|------------|---------------------------------------------------------------------------------------------------------------------------------------------------------------------------------------------------------------------------------------------------------------------------------------------------------------------------------------------------------------------------|---------------------------------------------------------------|
| 2018.10.11 | <ol style="list-style-type: none"> <li>1. Hyperplasia of bone marrow was actively ongoing.</li> <li>2. Lymphoblast and prolymphocyte total count was 16.5% (18.5% by flow cytometry).</li> <li>3. Granulopoiesis was partially arrested.</li> <li>4. Erythropoiesis was generally normal.</li> <li>5. Megakaryocytes and platelets were occasionally observed.</li> </ol> | The second relapse was initially detected one year after HSCT |
| 2018.10.19 | <ol style="list-style-type: none"> <li>1. Lymphoblasts and prolymphocytes total count was 38% (flow cytometry not performed).</li> <li>2. Granulopoiesis was abnormal.</li> <li>3. Megakaryocytes were not observed.</li> <li>4. Platelets were occasionally observed.</li> </ol>                                                                                         | Day 7 after VDL chemotherapy                                  |
| 2018.10.23 | <ol style="list-style-type: none"> <li>1. Lymphoblasts and prolymphocytes total count was 8.3% (flow cytometry was not performed).</li> <li>2. No nucleated granulocytes were observed.</li> <li>3. The ratio of polychromatic normoblasts to orthochromatic normoblasts was low.</li> <li>4. Megakaryocytes and platelets were not observed.</li> </ol>                  | Day -1 relative to the day of the first CD19mCAR-T infusion   |
| 2018.11.08 | <ol style="list-style-type: none"> <li>1. Hyperplasia of bone marrow was actively ongoing.</li> <li>2. Lymphoblasts and prolymphocytes total count was 80% (flow cytometry not performed).</li> <li>3. Granulopoiesis and erythropoiesis were reduced.</li> <li>4. Megakaryocytes were not observed.</li> <li>5. Platelets were occasionally observed.</li> </ol>         | Day 14 after the first CD19mCAR-T infusion                    |
| 2018.11.19 | <ol style="list-style-type: none"> <li>1. Hyperplasia of bone marrow was at a significant level.</li> <li>2. Lymphoblasts and prolymphocytes total count was 93.5% (flow cytometry not performed).</li> <li>3. Granulopoiesis and erythropoiesis were arrested.</li> <li>4. Megakaryocytes and platelets were occasionally observed.</li> </ol>                           | Day 8 after the second CD19mCAR-T infusion                    |
| 2018.12.05 | <ol style="list-style-type: none"> <li>1. Hyperplasia of bone marrow was reduced.</li> <li>2. Lymphoblasts and prolymphocytes total count was 65% (flow cytometry not performed).</li> </ol>                                                                                                                                                                              | Start treatment with VDLD plus bortezomib                     |

|            |                                                                                                                                                                                                                                                                                                                                                                                                                                                                       |                                           |
|------------|-----------------------------------------------------------------------------------------------------------------------------------------------------------------------------------------------------------------------------------------------------------------------------------------------------------------------------------------------------------------------------------------------------------------------------------------------------------------------|-------------------------------------------|
|            | <ol style="list-style-type: none"> <li>3. Granulopoiesis and erythropoiesis were arrested.</li> <li>4. Megakaryocytes and platelets were occasionally observed.</li> </ol>                                                                                                                                                                                                                                                                                            |                                           |
| 2019.05.06 | Bone marrow sample did not qualify for MRD or morphology test.                                                                                                                                                                                                                                                                                                                                                                                                        | Day 0 of CD19hsCAR-T infusion             |
| 2019.05.13 | <ol style="list-style-type: none"> <li>1. The observed granulocytes were mainly at the mature stage, and some neutrophils showed stained particles in cytoplasm.</li> <li>2. Lymphoblasts and prolymphocytes were not observed (MDR-negative by flow cytometry).</li> <li>3. Megakaryocytes were not observed.</li> <li>4. Platelets were occasionally observed.</li> </ol>                                                                                           | Day 7 after CD19hsCAR-T infusion          |
| 2019.05.20 | <ol style="list-style-type: none"> <li>1. The observed granulocytes were mainly at the mature stage, and some neutrophils showed stained particles in cytoplasm.</li> <li>2. Lymphoblasts and prolymphocytes were not observed (MDR-negative by flow cytometry).</li> <li>3. Nucleated erythrocytes were occasionally observed.</li> <li>4. Megakaryocytes were not observed.</li> <li>5. Platelets were occasionally observed.</li> </ol>                            | Day 14 after CD19hsCAR-T infusion         |
| 2019.06.03 | <ol style="list-style-type: none"> <li>1. The observed granulocytes were mainly at the mature stage, and some neutrophils showed stained particles in cytoplasm.</li> <li>2. Lymphoblasts and prolymphocytes were not observed (MDR-negative by flow cytometry).</li> <li>3. The ratio of polychromatic normoblasts to orthochromatic normoblasts was low.</li> <li>4. Megakaryocytes were not observed.</li> <li>5. Platelets were occasionally observed.</li> </ol> | About 1 month after CD19hsCAR-T infusion  |
| 2019.07.03 | <ol style="list-style-type: none"> <li>1. Hematopoiesis of bone marrow was active.</li> <li>2. Lymphoblasts and prolymphocytes were not observed (MDR-negative by flow cytometry).</li> <li>3. Granulopoiesis was generally normal.</li> <li>4. Erythropoiesis was generally normal.</li> <li>5. Megakaryocytes and platelets were occasionally observed.</li> </ol>                                                                                                  | About 2 months after CD19hsCAR-T infusion |

|            |                                                                                                                                                                                                                                                                                                                                                                                                                      |                                           |
|------------|----------------------------------------------------------------------------------------------------------------------------------------------------------------------------------------------------------------------------------------------------------------------------------------------------------------------------------------------------------------------------------------------------------------------|-------------------------------------------|
| 2019.08.02 | <ol style="list-style-type: none"> <li>1. Hematopoiesis of bone marrow was active.</li> <li>2. Lymphoblasts and prolymphocytes were not observed (MDR-negative by flow cytometry).</li> <li>3. Granulopoiesis was normal.</li> <li>4. Erythropoiesis was normal.</li> <li>5. Megakaryocytes were not observed.</li> <li>6. Platelets were occasionally observed.</li> <li>7. Reticulocytes were observed.</li> </ol> | About 3 months after CD19hsCAR-T infusion |
| 2019.09.02 | <ol style="list-style-type: none"> <li>1. Hematopoiesis of bone marrow was active.</li> <li>2. Lymphoblasts and prolymphocytes were not observed (MDR-negative by flow cytometry).</li> <li>3. Granulopoiesis was normal.</li> <li>4. Erythropoiesis was normal.</li> <li>5. Megakaryocytes and platelets were occasionally observed.</li> </ol>                                                                     | About 4 months after CD19hsCAR-T infusion |
| 2019.10.11 | <ol style="list-style-type: none"> <li>1. Lymphoblasts and prolymphocytes were not observed (MDR-negative by flow cytometry).</li> <li>2. The observed granulocytes were mainly at the mature stage, and some neutrophils showed stained particles in cytoplasm.</li> <li>3. Erythropoiesis was normal.</li> <li>4. Megakaryocytes and platelets were occasionally observed.</li> </ol>                              | About 5 months after CD19hsCAR-T infusion |
| 2019.11.20 | <ol style="list-style-type: none"> <li>1. Hematopoiesis of bone marrow was active.</li> <li>2. Lymphoblasts and prolymphocytes were not observed (MDR-negative by flow cytometry).</li> <li>3. Granulopoiesis was normal.</li> <li>4. Erythropoiesis was normal.</li> <li>5. Megakaryocytes and platelets were occasionally observed.</li> </ol>                                                                     | About 6 months after CD19hsCAR-T infusion |
| 2019.12.16 | <ol style="list-style-type: none"> <li>1. Hematopoiesis of bone marrow was active.</li> <li>2. Lymphoblasts and prolymphocytes were not observed (MDR-negative by flow cytometry).</li> <li>3. Granulopoiesis was normal.</li> <li>4. Erythropoiesis was normal.</li> </ol>                                                                                                                                          | About 7 months after CD19hsCAR-T infusion |

|            |                                                                                                                                                                                                                                                                                                                                                                             |                                           |
|------------|-----------------------------------------------------------------------------------------------------------------------------------------------------------------------------------------------------------------------------------------------------------------------------------------------------------------------------------------------------------------------------|-------------------------------------------|
|            | <ul style="list-style-type: none"> <li>5. Megakaryocytes were not observed.</li> <li>6. Platelets showed scattered distribution.</li> </ul>                                                                                                                                                                                                                                 |                                           |
| 2020.01.10 | <ul style="list-style-type: none"> <li>1. Hematopoiesis of bone marrow was active.</li> <li>2. Lymphoblasts and prolymphocytes were not observed (MDR-negative by flow cytometry).</li> <li>3. Granulopoiesis was normal.</li> <li>4. Erythropoiesis was normal.</li> <li>5. Megakaryocytes were not observed.</li> <li>6. Platelets were occasionally observed.</li> </ul> | About 8 months after CD19hsCAR-T infusion |

Table S2. Bilirubin test results.

| Days after infusion | Total bilirubin $\mu\text{mol/L}$ | Direct bilirubin $\mu\text{mol/L}$ |
|---------------------|-----------------------------------|------------------------------------|
| 0                   | 5.990                             | 0.87                               |
| 7                   | 5.810                             | 1.25                               |
| 14                  | 23.730                            | 15.42                              |
| 21                  | 38.510                            | 24.74                              |
| 28                  | 32.060                            | 19.00                              |
| 35                  | 27.220                            | 15.08                              |
| 42                  | 12.730                            | 4.36                               |
| 49                  | 13.020                            | 5.01                               |
| 56                  | 10.980                            | 4.15                               |
| 63                  | 10.980                            | 4.15                               |
| 77                  | 12.920                            | 5.05                               |
| 88                  | 11.300                            | 4.88                               |
| 96                  | 7.120                             | 2.37                               |
| 112                 | 5.830                             | 1.77                               |
| 120                 | 5.430                             | 1.32                               |
| 134                 | 8.350                             | 4.94                               |
| 150                 | 8.320                             | 2.31                               |
| 165                 | 11.810                            | 3.06                               |
| 183                 | 12.950                            | 5.44                               |
| 205                 | 9.412                             | 3.29                               |
| 232                 | 8.540                             | 4.03                               |



Table S3. Platelet and white blood cell counts.

| Days after infusion | Platelet count ( $10^9/L$ ) | White blood cells ( $10^9/L$ ) |
|---------------------|-----------------------------|--------------------------------|
| 0                   | 31                          | 4.22                           |
| 7                   | 21                          | 5.34                           |
| 14                  | 68                          | 7.24                           |
| 21                  | 23                          | 5.49                           |
| 28                  | 16                          | 6.76                           |
| 58                  | 26                          | 5.48                           |
| 88                  | 19                          | 4.54                           |
| 118                 | 26                          | 5.96                           |
| 178                 | 17                          | 3.13                           |
| 210                 | 35                          | 3.85                           |
| 236                 | 43                          | 4.37                           |

Table S4. Subpopulation analysis of the final products.

|                    |                                                 | Final products |             |
|--------------------|-------------------------------------------------|----------------|-------------|
|                    |                                                 | CD19mCAR-T     | CD19hsCAR-T |
| Starting PBMCs     | CD3+ in PBMCs                                   | 8.31%          | 6.79%       |
|                    | CD19+ in PBMCs                                  | 1.94%          | 2.41%       |
|                    | Naïve T cells in CD3+ T cells                   | 34.56%         | 32.15%      |
|                    | Terminal differentiated T cells in CD3+ T cells | 43.00%         | 55.06%      |
|                    | Central memory T cells in CD3+ T cells          | 9.54%          | 1.34%       |
|                    | Effector memory T cells in CD3+ T cells         | 12.90%         | 11.45%      |
| Final Product (FP) | CD3+ in FP                                      | 95.2%          | 94.0%       |
|                    | CD19+ in FP                                     | OOL            | OOL         |
|                    | CAR+ T cells in FP                              | 15.7%          | 20.2%       |
|                    | Naïve T cells in CAR+ T cells                   | 1.80%          | 0.45%       |
|                    | Terminal differentiated T cells in CAR+ T cells | 29.40%         | 9.89%       |
|                    | Central memory T cells in CAR+ T cells          | 38.70%         | 78.66%      |
|                    | Effector memory T cells in CAR+ T cells         | 30.10%         | 11.00%      |

Note: FP, final product; OOL, out of limit.
